# Supplementary material
Source: Research Square preprint supplement (doi:10.21203/rs.3.rs-9605064/v1)
Supplement: Supplementary file 1 [file 6821992f2d6310dd9c05f90b.docx]

# Supplementary Information

Safety of Cardiopulmonary Exercise Testing in Patients with Severe Post-COVID-19 Condition: A Matched Case-Control Study

Journal: Scientific Reports (Original Research Article)

Vincent Weber1, Aleksandar Tomaskovic1, David T. Ochmann1, Barlo Hillen1,2, Severin Zentgraf1, Mirjam S. Enger1, Ella Lachtermann1, Elmo W. I. Neuberger1 and Perikles Simon1

1Department of Sports Medicine, Prevention and Rehabilitation, Institute for Sport Science, Johannes Gutenberg-University Mainz, Mainz, Germany

2Institute for Occupational, Social and Environmental Medicine, University Medical Center of the Johannes Gutenberg-University Mainz, Mainz, Germany

Corresponding Author:

Prof. Perikles Simon, MD, PhD

Department of Sports Medicine, Prevention and Rehabilitation

Institute of Sport Science

Johannes Gutenberg University Mainz

Albert Schweitzer Street 22

Mainz, 55128

Germany

Email: [simonpe@uni-mainz.de](mailto:simonpe@uni-mainz.de)

**Supplementary File 1** The German version of the Symptom Severity Score Questionnaire, as used in the study, based on Baraniuk et al. (2013)


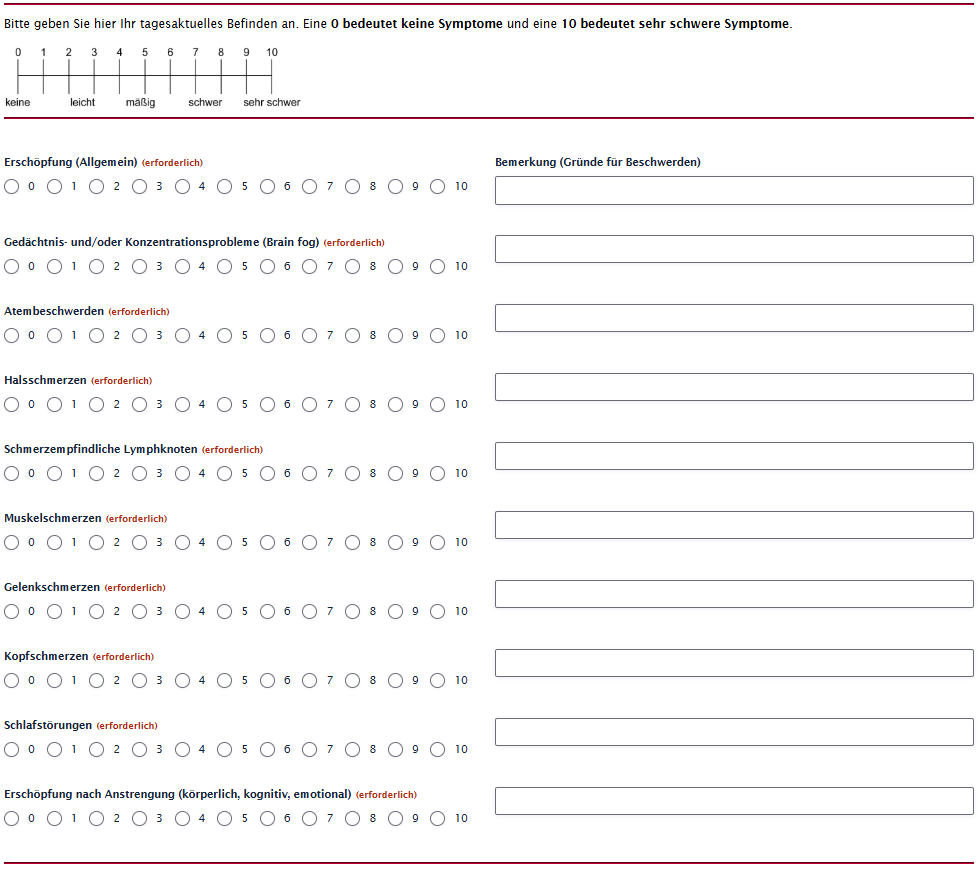


Baraniuk, J. N., Adewuyi, O., Merck, S. J., Ali, M., Ravindran, M. K., Timbol, C. R., Rayhan, R., Zheng, Y., Le, U., Esteitie, R., & Petrie, K. N. (2013). A Chronic Fatigue Syndrome (CFS) severity score based on case designation criteria. *American Journal of Translational Research*, *5*(1), 53–68.

**Supplementary File 2** Results of the CPET at exercise termination without two PCC patients with RER < 1.0 at exercise termination and their matched healthy controls.

|  | **PCC**  **at exhaustion** | **Control**  **at PCC exhaustion** | | | **Control**  **at exhaustion** | | |
| --- | --- | --- | --- | --- | --- | --- | --- |
|  | **N = 16 (50%)**1 | **N = 16 (50%)**1 | **% diff** | **p-value1** | **N = 16 (50%)**1 | **% diff** | **p-value1** |
| VO2 [mL/min/kg] | 16.3 ± 5.2 | 22.0 ± 6.8 | -24.4% | **0.014†** | 24.9 ± 7.4 | -36.8% | **<0.001†** |
| VO2 [%pred] | 68.7 ± 17.4 | 94.7 ± 27.4 | -25.5% | **0.004†** | 113.1 ± 26.3 | -39.3% | **<0.001†** |
| Power output [W] | 76.9 ± 41.2 | 129.7 ± 35.0 | -38.0% | **<0.001†** | 157.5 ± 26.0 | -51.2% | **<0.001†** |
| Power output [W/kg] | 1.1 ± 0.5 | 1.8 ± 0.6 | -37.9% | **<0.001†** | 2.3 ± 0.6 | -51.0% | **<0.001†** |
| Power output [%pred] | 59.5 ± 21.7 | 100.1 ± 27.6 | -38.2% | **<0.001†** | 121.6 ± 22.6 | -51.1% | **<0.001†** |
| HR [1/min] | 142.3 ± 22.5 | 146.5 ± 21.6 | -1.6% | 0.6† | 163.4 ± 16.1 | -13.0% | **0.005†** |
| RER | 1.10 ± 0.07 | 1.09 ± 0.07 | 0.0% | >0.9‡ | 1.2 ± 0.1 | -9.3% | **<0.001‡** |
| Lactate [mmol/L] | 3.7 ± 2.5 | 4.1 ± 2.6 | -7.1% | 0.6† | 7.0 ± 2.6 | -47.4% | **<0.001†** |
| RPE | 17.7 ± 1.9 | 16.4 ± 2.3 | 12.2% | 0.11† | 18.7 ± 1.6 | -5.4% | 0.12† |

Cardiopulmonary and perceptual responses obtained during symptom-limited CPET are shown for patients with post-COVID-19 condition (PCC, n = 16) and matched healthy controls (n = 16). Data are presented as mean ± standard deviation. Significant P-values are marked in bold. Group comparisons between PCC and controls were performed using † Welch two-sample t-tests for normally distributed variables and ‡ Wilcoxon rank-sum tests for non-normally distributed variables, as indicated. The statistical significance level was set at p < 0.05. CPET: cardiopulmonary exercise testing; PCC: post-COVID-19 condition; VO2: oxygen uptake; HR: heart rate; RER: respiratory exchange ratio; RPE: rate of perceived exertion; %pred: percent of predicted value according to sex, age, bodyweight; %diff: (meanPCC – meancontrol) / meancontrol × 100. 1Compared to PCC patients at exhaustion.

**Supplementary File 3**Results of the CPET at the second ventilatory threshold for PCC patients and their matched healthy controls.

|  | **PCC**  **N = 18 (50%)** | **Control**  **N = 18 (50%)** | **% diff** | **p-value** |
| --- | --- | --- | --- | --- |
| VO2VT2 [mL/min/kg] | 14.8 ± 3.3 | 21.1 ± 5.7 | -30.0% | **<0.001†** |
| Power OutputVT2 [W] | 67.0 ± 28.3 | 118.3 ± 21.1 | -43.4% | **<0.001†** |
| Power OutputVT2 [W/kg] | 1.0 ± 0.3 | 1.7 ± 0.5 | -43.0% | **<0.001†** |
| HRVT2 [1/min] | 129.5 ± 19.5 | 140.1 ± 19.5 | -7.5% | 0.13† |
| RERVT2 | 0.99 ± 0.05 | 1.06 ± 0.05 | -6.3% | **<0.001†** |
| LactateVT2 [mmol/L] | 1.9 ± 0.4 | 2.0 ± 0.5 | -8.4% | 0.2† |
| RPEVT2 | 15.4 ± 4.9 | 14.6 ± 1.8 | 6.1% | 0.9‡ |

Cardiopulmonary and perceptual responses obtained during symptom-limited CPET are shown for patients with post-COVID-19 condition (PCC, n = 18) and matched healthy controls (n = 18). Data are presented as mean ± standard deviation. Significant P-values are marked in bold. Group comparisons between PCC and controls were performed using † Welch two-sample t-tests for normally distributed variables and ‡ Wilcoxon rank-sum tests for non-normally distributed variables, as indicated. The statistical significance level was set at p < 0.05. CPET: cardiopulmonary exercise testing; PCC: post-COVID-19 condition; VO2: oxygen uptake; HR: heart rate; RER: respiratory exchange ratio; RPE: rate of perceived exertion; %diff: (meanPCC – meancontrol) / meancontrol × 100.

**Supplementary File 4** Individual symptom severity for patients with post-COVID-19 condition over different time periods before and after the CPET.


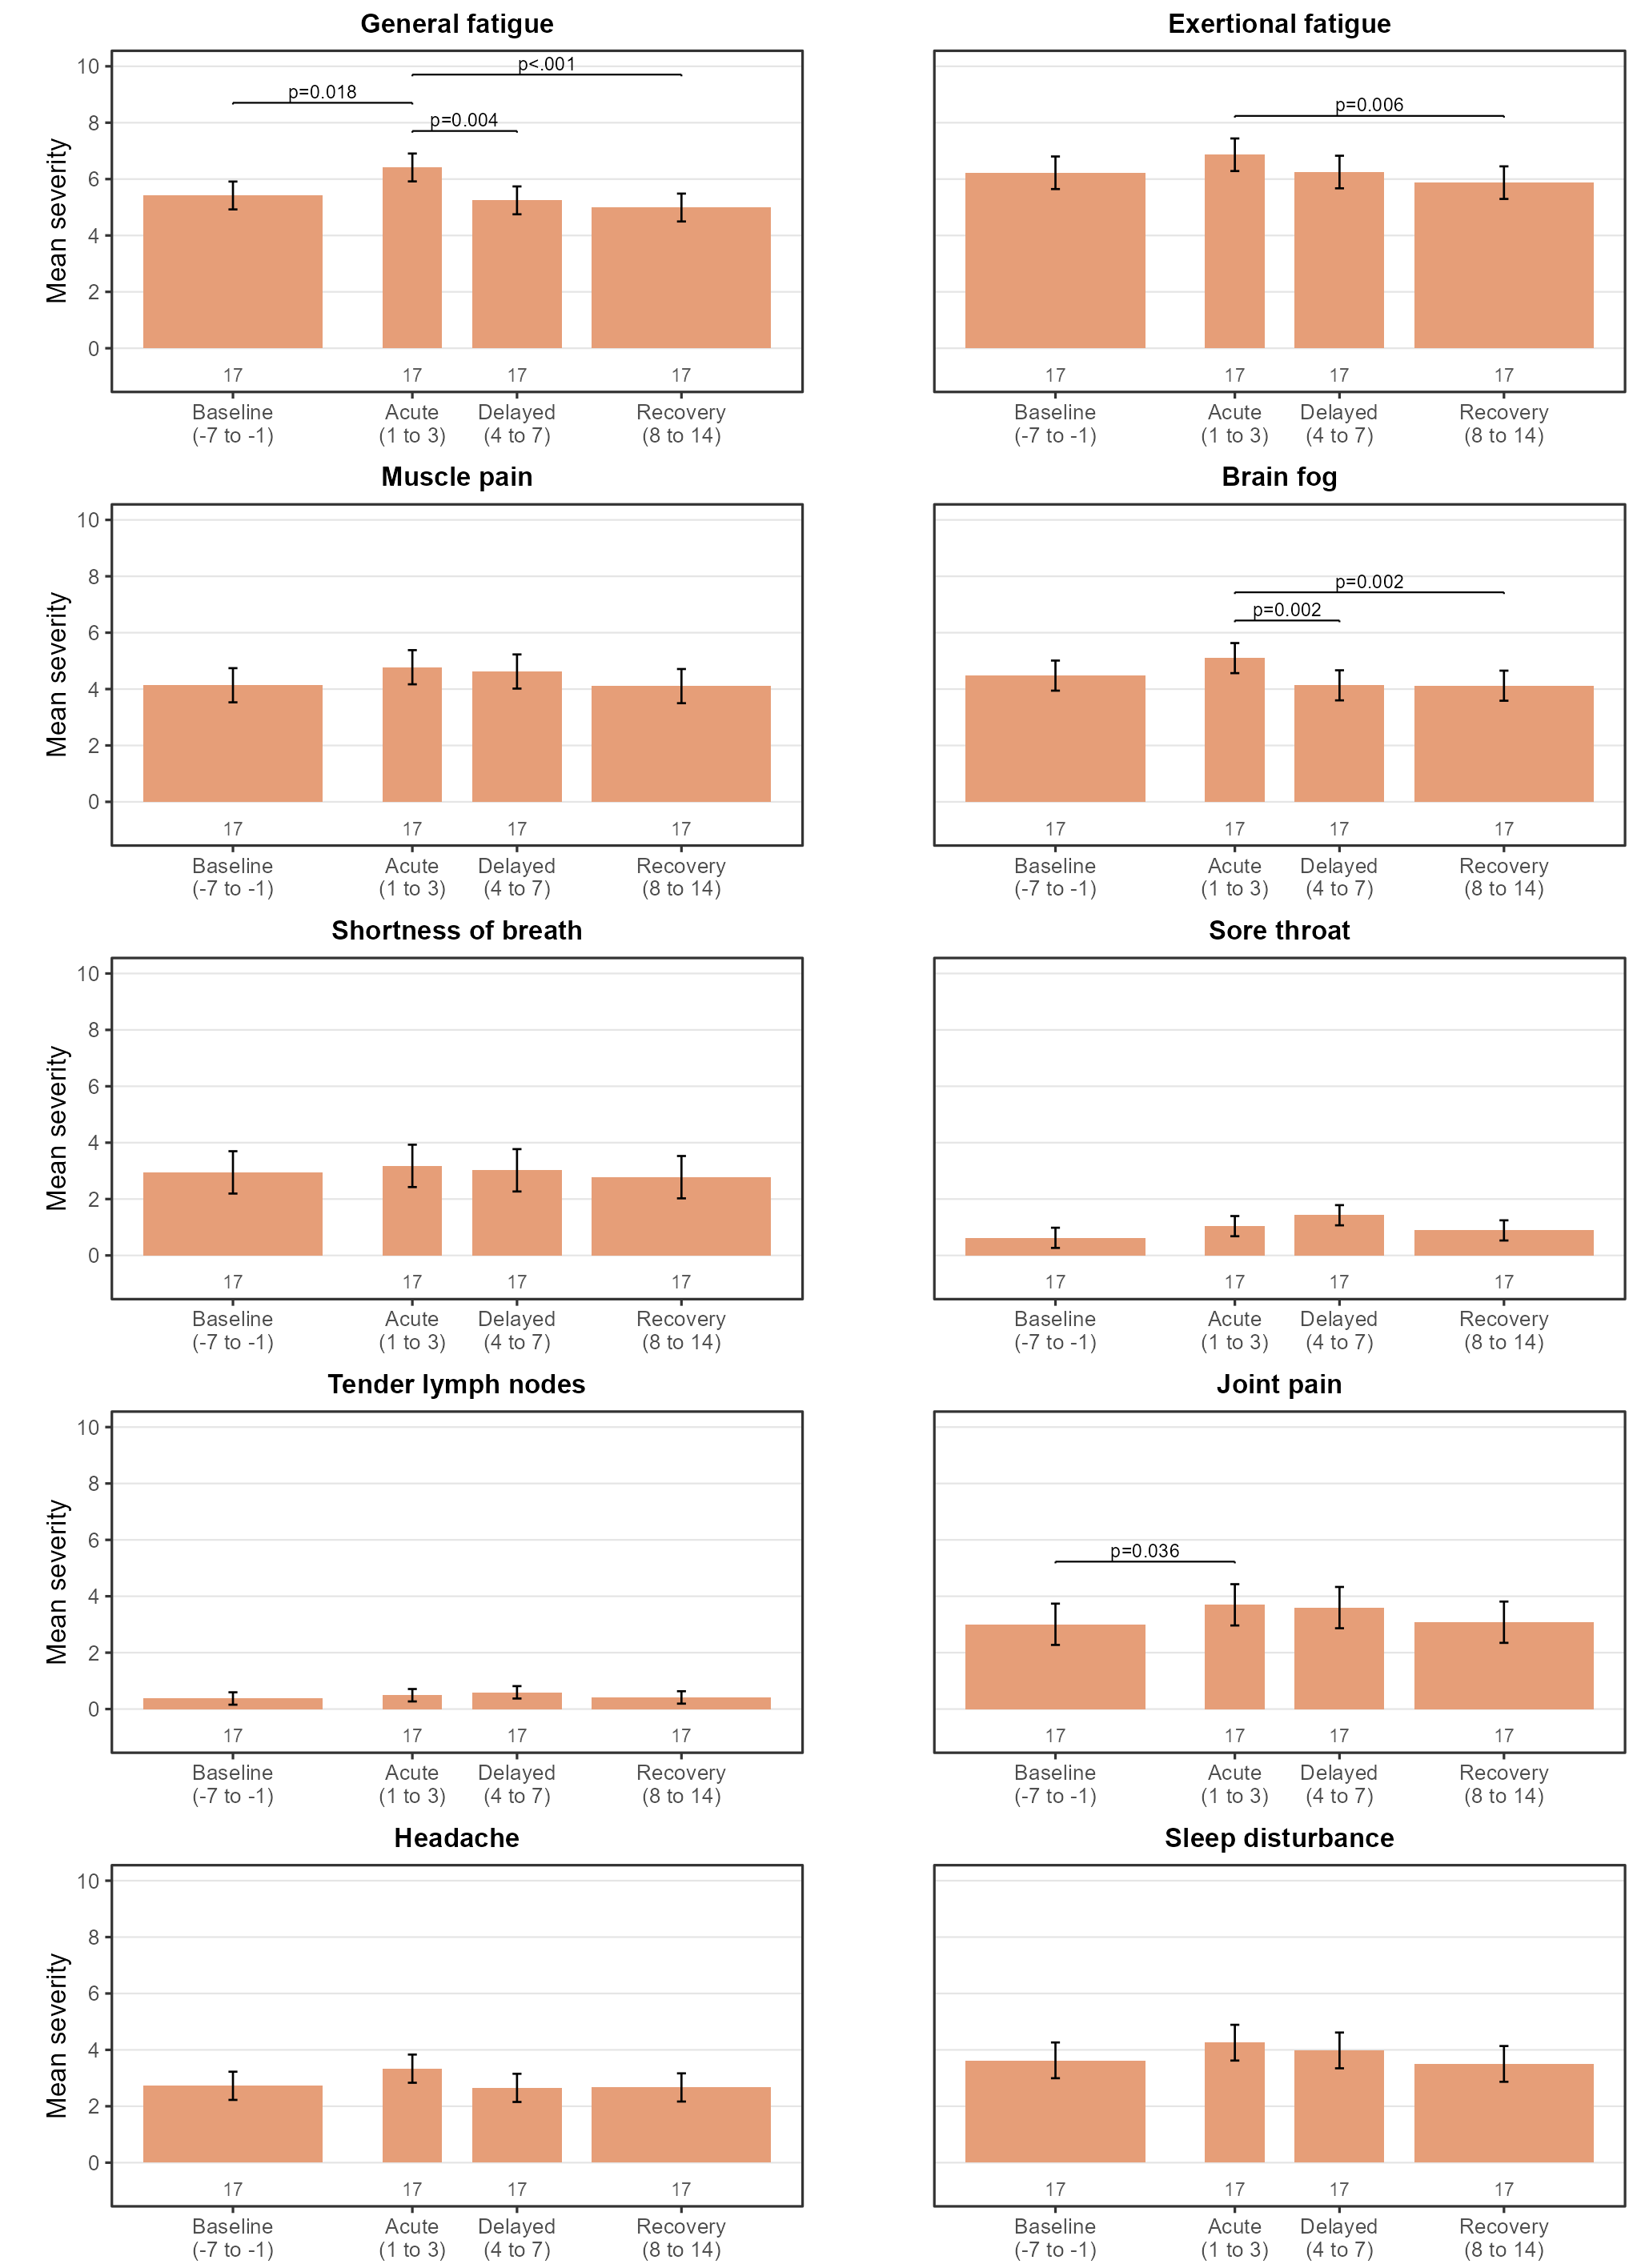


Mean symptom severity for post-COVID-19 condition patients over different time periods before and after the CPET. Data are presented as estimated means and standard errors, with exact p-values added where post-hoc differences were significant. The statistical significance level was set at p < 0.05. CPET: cardiopulmonary exercise test.
